# Supplementary material for: Mass production of lumenogenic human embryoid bodies and functional cardiospheres using in-air-generated microcapsules
Source: PubMed Central journal article supplement (PMC10590445; doi:10.1038/s41467-023-42297-0), 2023-10-21
Supplement: 41467_2023_42297_MOESM1_ESM.pdf [file 41467_2023_42297_MOESM1_ESM.pdf]

1 **Supporting Information**

2 **Mass Production of Lumenogenic Human Embryoid Bodies and Functional Cardiospheres using In-**  
3 **Air Generated Thin-shelled Microcapsules**

4 Bas van Loo<sup>1</sup>, Simone A. ten Den<sup>2</sup>, Nuno Araújo-Gomes<sup>1</sup>, Vincent de Jong<sup>1</sup>, Rebecca R. Snabel<sup>3</sup>, Maik  
5 Schot<sup>1</sup>, José M. Rivera-Arbeláez<sup>2,4</sup>, Gert Jan C. Veenstra<sup>3</sup>, Robert Passier<sup>2,5</sup>, Tom Kamperman<sup>1,6</sup>, and  
6 Jeroen Leijten<sup>1</sup>

7

8 <sup>1</sup> University of Twente, TechMed Centre, Department of Developmental BioEngineering, Enschede,  
9 The Netherlands

10 <sup>2</sup> University of Twente, TechMed Centre, Department of Applied Stem Cell Technology, Enschede,  
11 The Netherlands

12 <sup>3</sup> Radboud University, Radboud Institute for Molecular Life Sciences, Faculty of Science, Department  
13 of Molecular Developmental Biology, Nijmegen, The Netherlands

14 <sup>4</sup> University of Twente, TechMed Centre, Max Planck Center for Complex Fluid Dynamics, BIOS Lab-on-  
15 a-Chip Group , Enschede, The Netherlands

16 <sup>5</sup> Leiden University Medical Centre, Department of Anatomy and Embryology, Leiden, Netherlands

17 <sup>6</sup> lamFluidics B.V., De Veldmaat 17, 7522NM Enschede, The Netherlands.

18

19

20 **Supplemental figures**

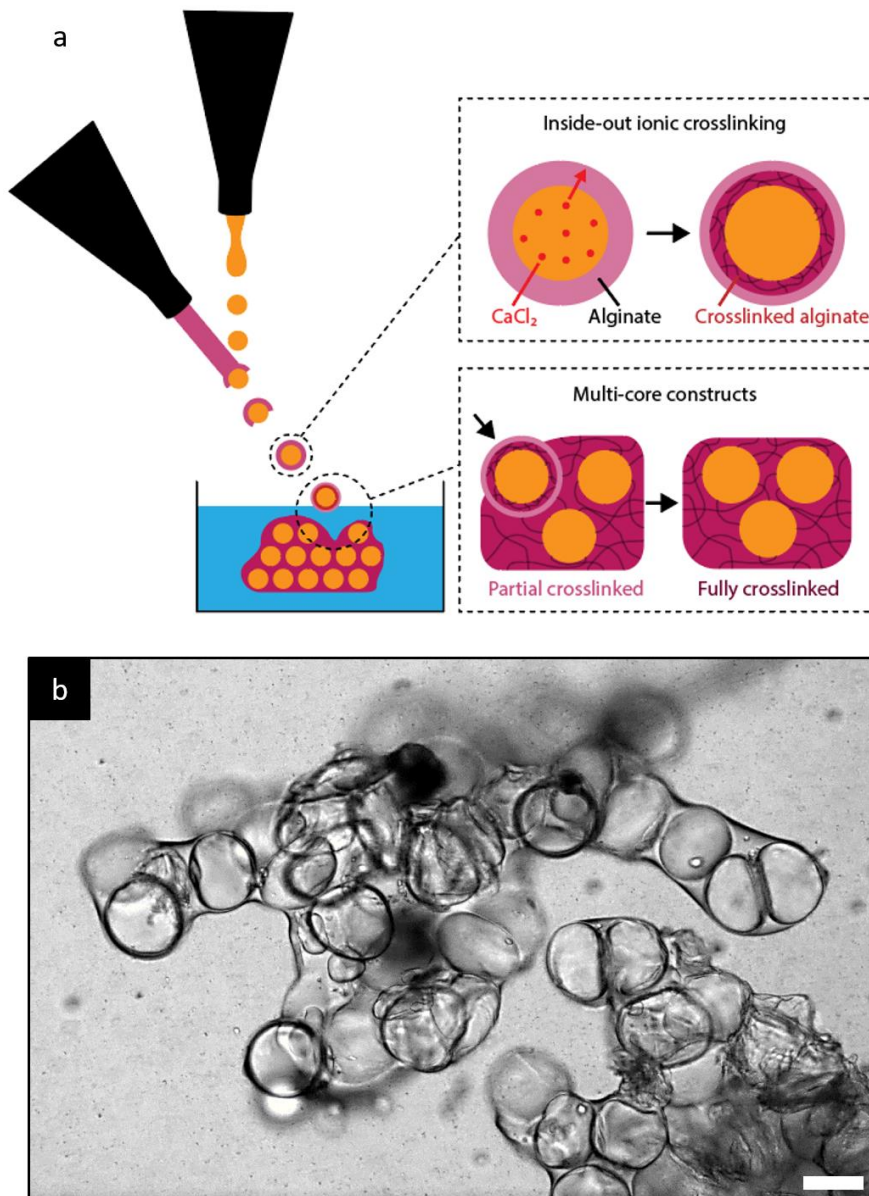

22

23 **Figure S1. In Air microfluidics using a two-nozzle setup results in formation of uncontrolled multi-**  
24 **compartment microparticles.** (a) Schematic of two-nozzle setup, inside-out crosslinking process, and  
25 mechanism by which multi-compartment microparticles are formed. (b) Microphotograph of formed  
26 microparticle using two-nozzle in-air microfluidics. Scale bar represents 200  $\mu\text{m}$ .

27

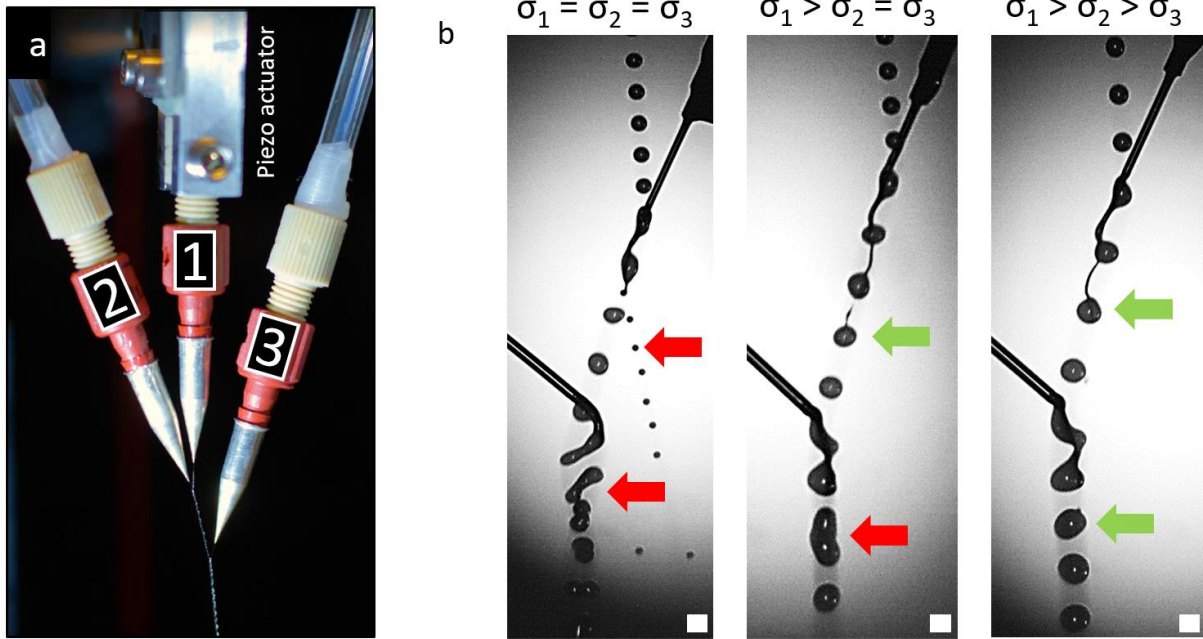

28

29 **Figure S2. In Air microfluidics three-nozzle setup for In Air droplet encapsulation.** (a) Photograph of  
 30 a three nozzle In Air microfluidics setup, with a piezo-electric actuator attached to the first nozzle. (b)  
 31 Microphotographs of the encapsulation process with  $\sigma_1 = \sigma_2 = \sigma_3$ ,  $\sigma_1 > \sigma_2 = \sigma_3$  and  $\sigma_1 > \sigma_2 > \sigma_3$ . Red  
 32 arrows indicate spraying and improper encapsulation, green arrows indicate proper encapsulation.  
 33 Scale bar represents 200  $\mu\text{m}$ .

34

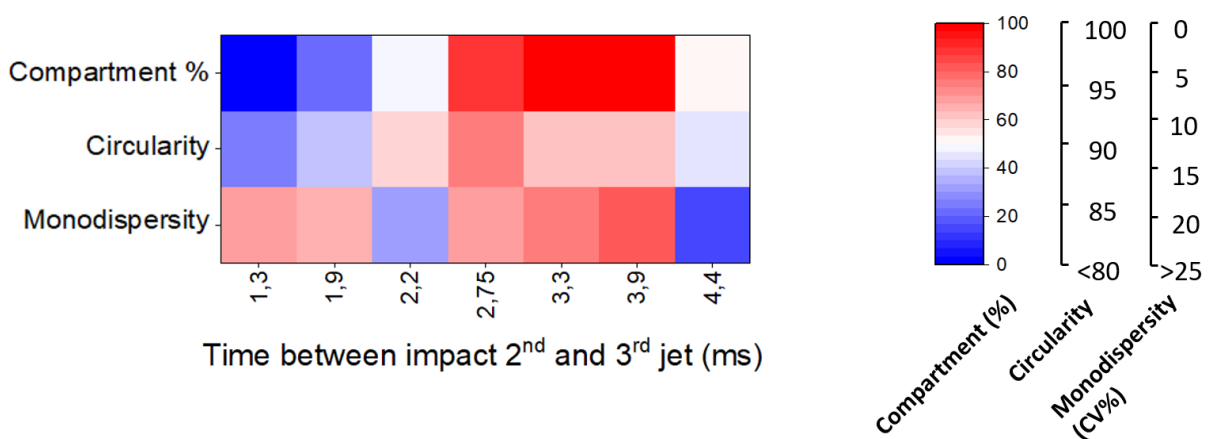

35

36 **Figure S3. Third jet coalescence location dictates hollow microcapsule formation.** Effect of in-air flight  
 37 time before third jet coalescences with the droplet train as analyzed in terms of percentage of single  
 38 compartment, circularity, and monodispersity of produced microparticles ( $n > 85$ ).

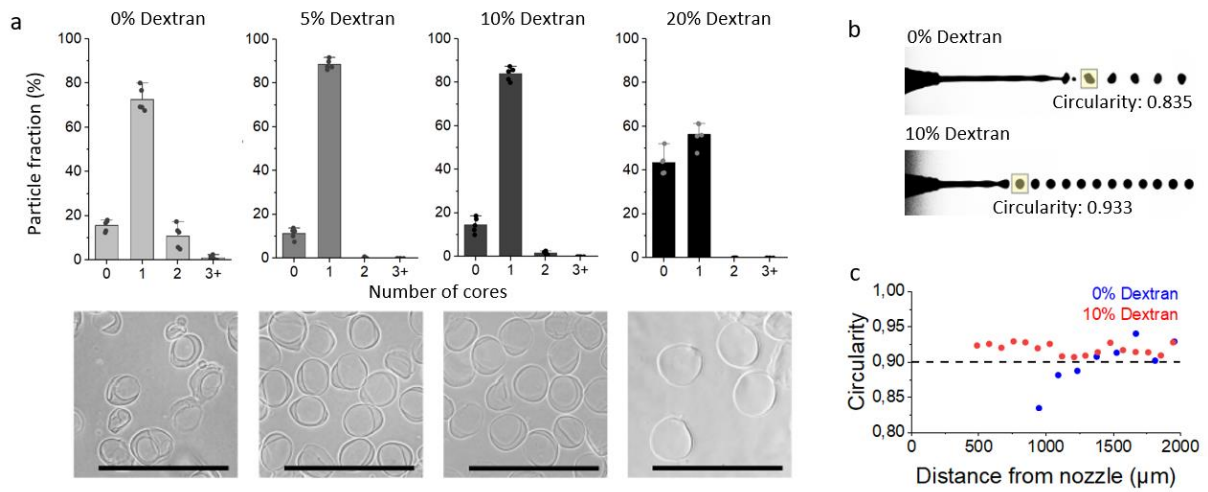

40

41 **Figure S4. Effect of dextran in core liquid on hollow microcapsule formation.** (a) Number of hollow  
 42 compartments per microparticle using dextran core liquid concentrations of 0%, 5%, 10%, and 20%,  
 43 including corresponding microphotographs (n=60). Data is presented as mean values  $\pm$  SD. (b)  
 44 Microphotographs and (c) quantification of circularity of formed droplets with and without 10%  
 45 dextran. Scale bar represents 400  $\mu\text{m}$ .

46

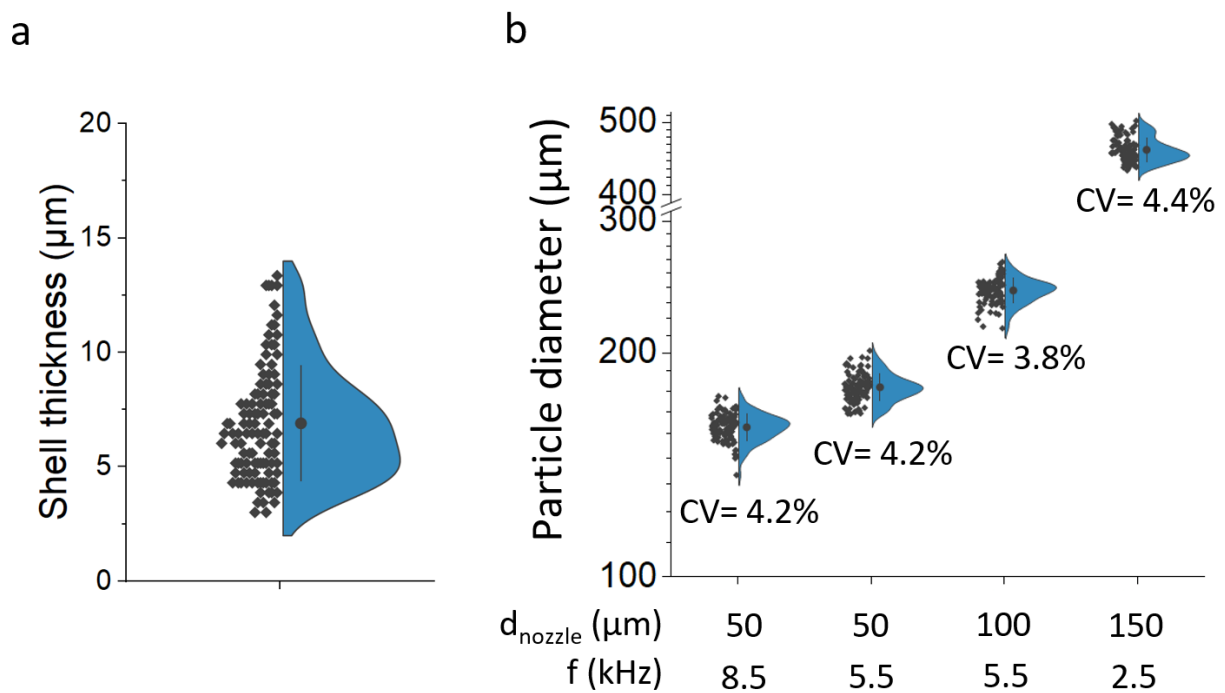

47

48 **Figure S5. Hollow microcapsule morphology.** (a) Quantification of shell thickness of in-air produced  
 49 microcapsules (n=107). Data is presented as mean values +/- SD. (b) Quantification of microcapsule  
 50 diameter and monodispersity using different nozzle sizes and different piezo-electric actuator  
 51 frequencies (n=100). Data is presented as mean values +/- SD.

52

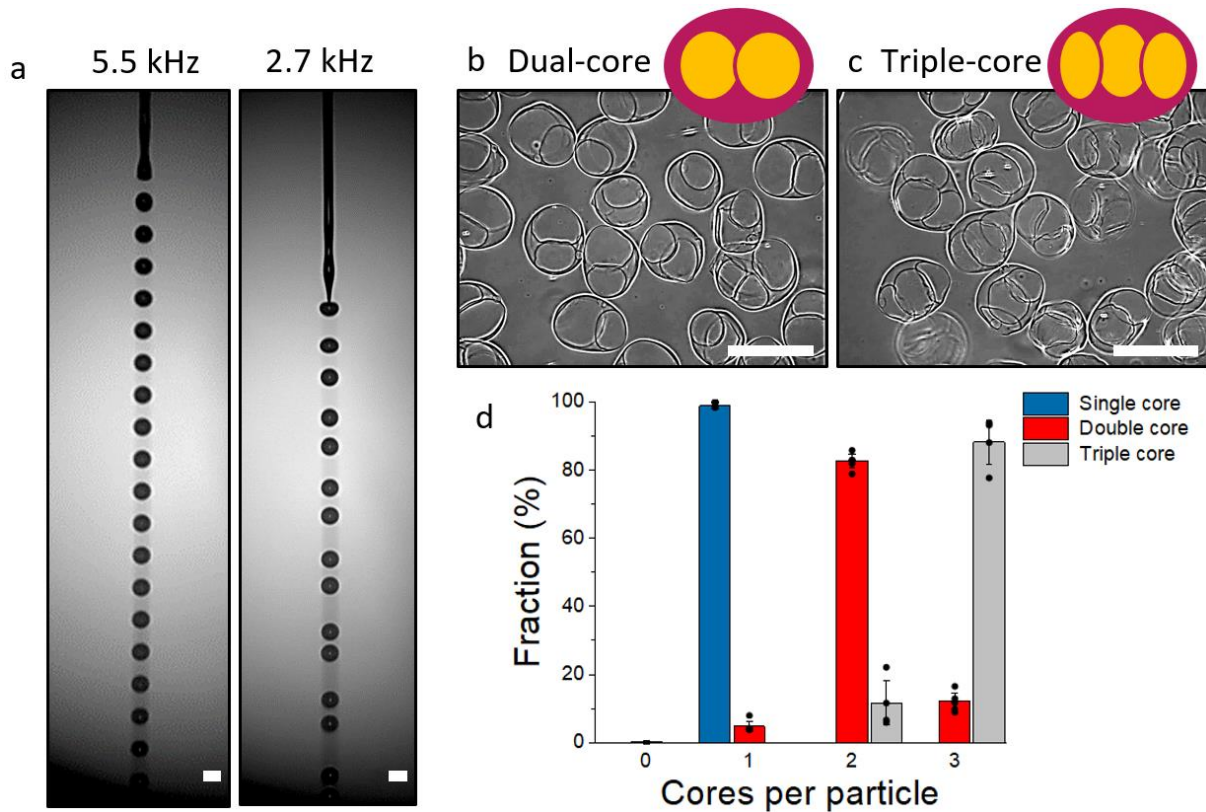

53

54 **Figure S6. Controlled production of multi-core microparticles by adjusting piezo-actuator frequency.**

55 (a) Microphotographs of droplet formation at 5.5 kHz and 2.7 kHz. (b) Microphotograph of dual-core  
 56 microcapsules (c) and triple-core microcapsules. (d) Quantification of percentage single-, dual-, and  
 57 triple-core microcapsules (n=169 microparticles). Data is presented as mean values +/- SD. Scale bar  
 58 represents 200  $\mu$ m.

59

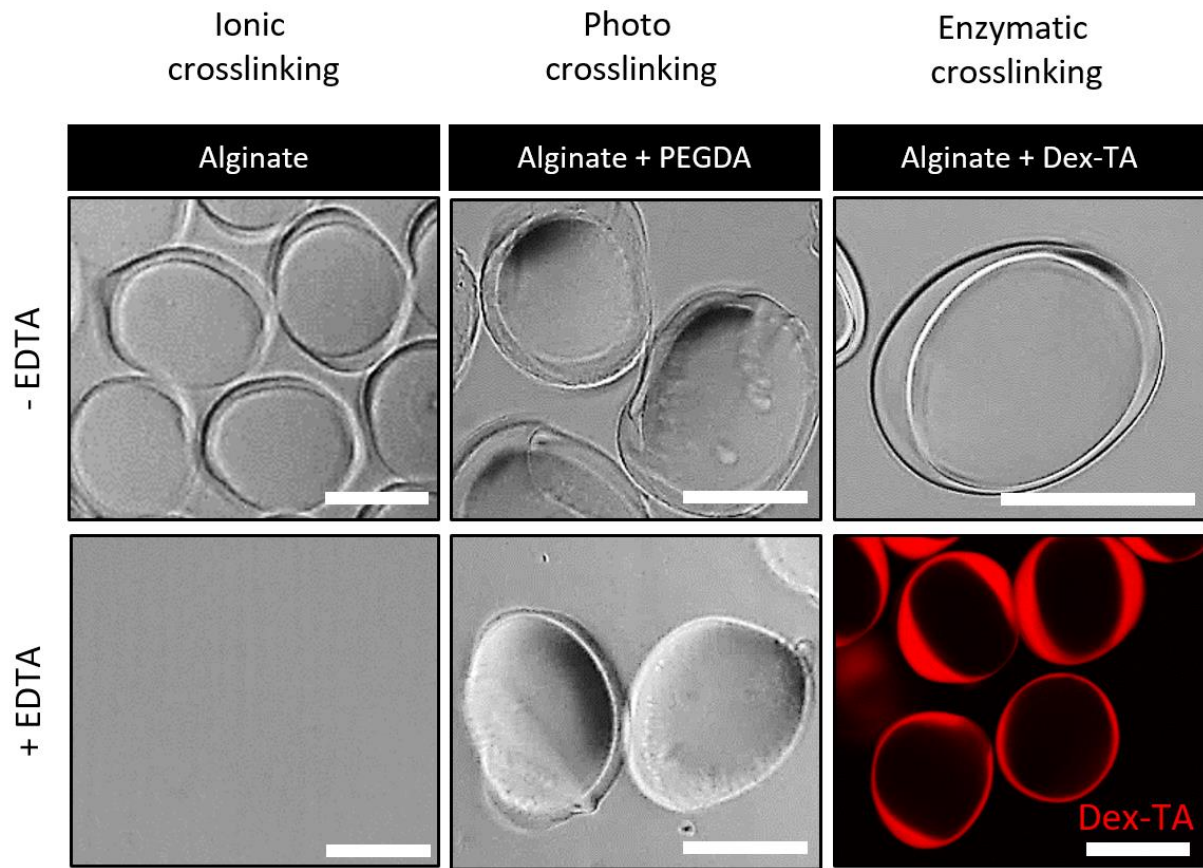

60

61 **Figure S7. In Air production of microcapsules using photocrosslinkable and enzymatic crosslinkable**  
 62 **materials.** Microphotographs of ionically crosslinked alginate microcapsules, photocrosslinked PEGDA  
 63 microcapsules, and enzymatic crosslinked dextran-tyramine microcapsules, before and after EDTA  
 64 treatment. Dex-TA microcapsules post-EDTA were stained with ethidium homodimer (red). Scale bar  
 65 represent 100  $\mu\text{m}$ .

66

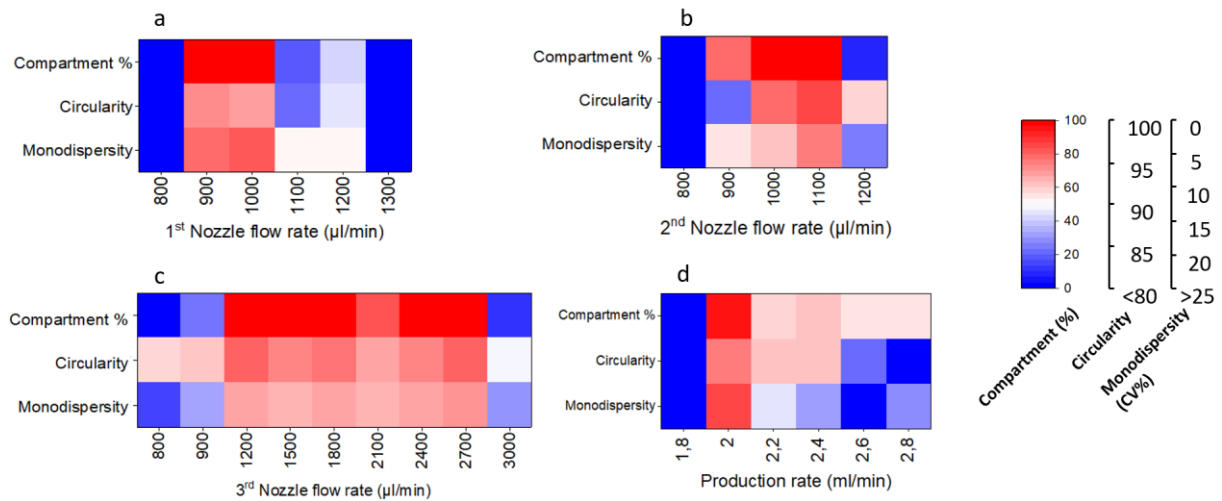

67

68 **Figure S8. Flow rate optimization for microcapsules production.** Quantification of the percentage of  
 69 microparticles containing a single compartment, circularity of formed microparticles, and microparticle  
 70 monodispersity. Setup used: Nozzle 1 (50 μm) at 900 μl/min, nozzle 2 (50 μm) at 1100 μl/min, nozzle  
 71 3 (100 μm) at 1500 μl/min. (a) Effect of first nozzle flow rate on microparticle formation (n=100). (b)  
 72 Effect of second nozzle flow rate on microparticle formation (n=100). (c) Effect of third nozzle flow rate  
 73 on microparticle formation (n=100). (d) Effect of total production flow rate on microparticle formation  
 74 (n=100). Ratios between flow rates were kept constant at the ratio described above.

75

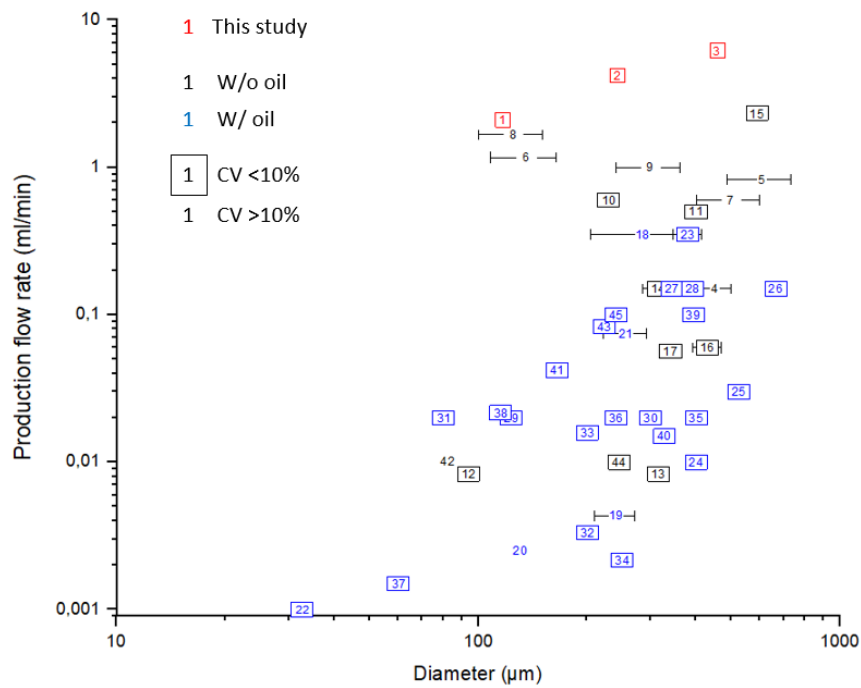

|       |                                   |
|-------|-----------------------------------|
| 1-3   | This work                         |
| 4     | Aghdam et al. <sup>[86]</sup>     |
| 5     | Correia et al. <sup>[44]</sup>    |
| 6     | Alessandri et al. <sup>[46]</sup> |
| 7     | Ma et al. <sup>[47]</sup>         |
| 8     | Alessandri et al. <sup>[45]</sup> |
| 9     | Rutkowski et al. <sup>[48]</sup>  |
| 10    | Sakai et al. <sup>[48]</sup>      |
| 11    | Ren et al. <sup>[69]</sup>        |
| 12-13 | Song et al. <sup>[69]</sup>       |
| 14    | Zhao et al. <sup>[79]</sup>       |
| 15    | Domejean et al. <sup>[65]</sup>   |
| 16    | Rao et al. <sup>[40]</sup>        |
| 17-18 | Nguyen et al. <sup>[43]</sup>     |
| 19    | Agarwal et al. <sup>[41]</sup>    |
| 20    | Kim et al. <sup>[67]</sup>        |
| 21    | Ashida et al. <sup>[64]</sup>     |
| 22    | Seuss et al. <sup>[64]</sup>      |
| 23    | Agarwal et al. <sup>[63]</sup>    |
| 24    | Siltanen et al. <sup>[71]</sup>   |
| 25    | Zhao et al. <sup>[78]</sup>       |
| 26-28 | Watanabe et al. <sup>[75]</sup>   |
| 29-31 | van Loo et al. <sup>[74]</sup>    |
| 32    | Sun et al. <sup>[73]</sup>        |
| 33    | Hu et al. <sup>[66]</sup>         |
| 34    | Xie et al. <sup>[76]</sup>        |
| 35    | Yang et al. <sup>[77]</sup>       |
| 36    | Kamperman et al. <sup>[54]</sup>  |
| 37    | Yu et al. <sup>[80]</sup>         |
| 38    | Lin et al. <sup>[68]</sup>        |
| 39    | Fattahi et al. <sup>[85]</sup>    |
| 40    | Zhu et al. <sup>[84]</sup>        |
| 41    | Jeong et al. <sup>[83]</sup>      |
| 42    | Mytnyk et al. <sup>[49]</sup>     |
| 43    | Wang et al. <sup>[81]</sup>       |
| 44    | Liu et al. <sup>[39]</sup>        |
| 45    | Liu et al. <sup>[82]</sup>        |

76

77

78

79

80 **Figure S9. Literature study for continuously produced hollow core-shell microcapsules.**

81 Elaboration of figure 21 with corresponding studies per datapoint.

82

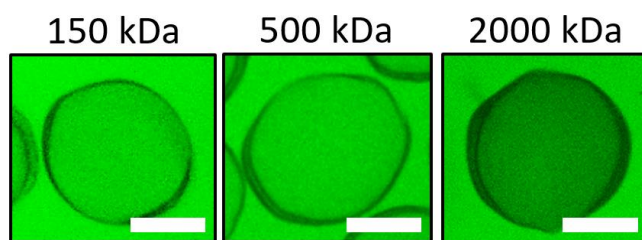

83

84 **Figure S10. Permeability of microcapsules.**



85 Fluorescent confocal micrographs of microcapsules incubated for 30 minutes in Dextran-FITC  
86 containing solutions of 150 kDa, 500 kDa and 2000 kDa. Representative micrographs out n=3  
87 experiments. Scale bars represent 100  $\mu\text{m}$ .

88

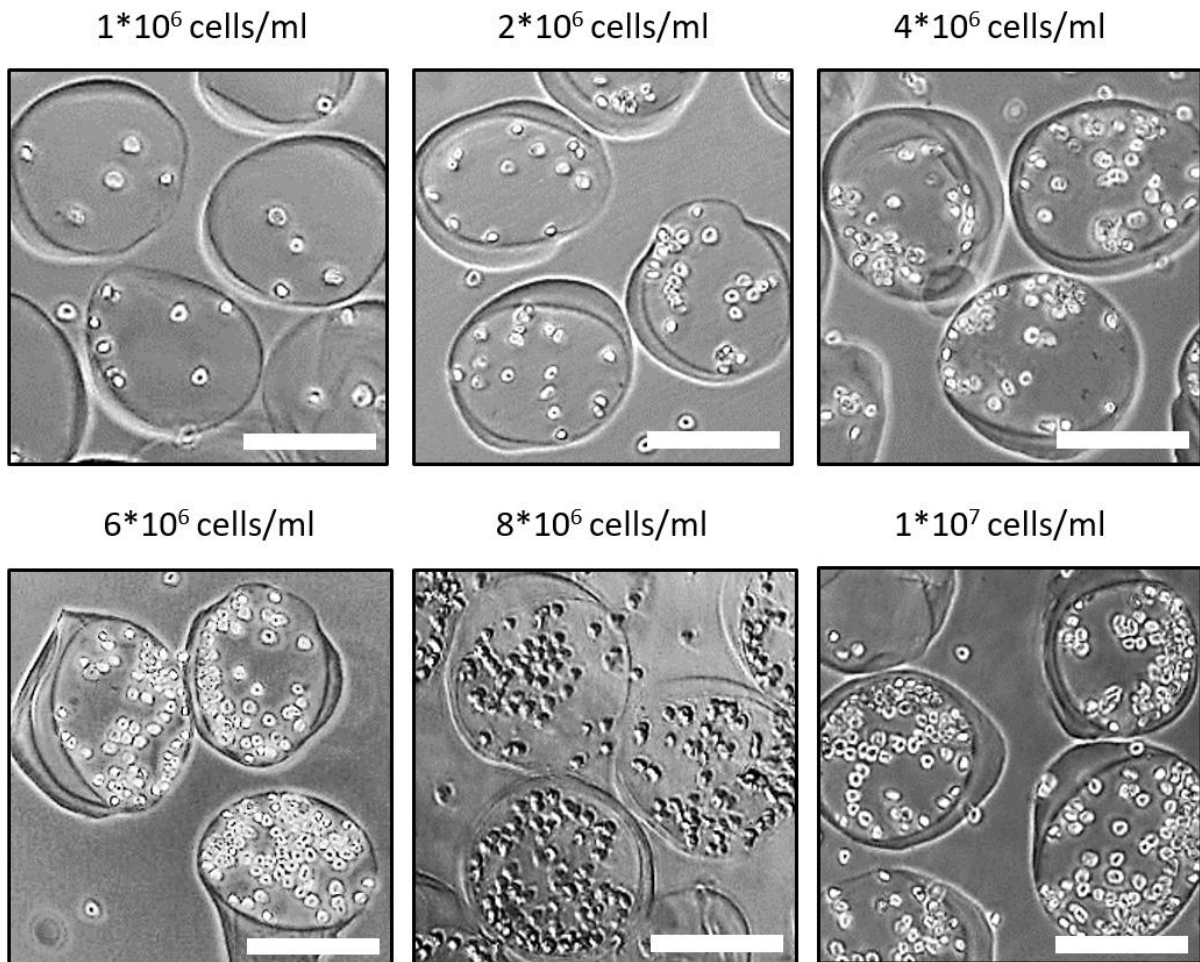

89

90 **Figure S11. In Air microencapsulation of 3T3 Fibroblast within alginate microcapsules.**

91 Microphotographs of 3T3 fibroblast-laden microcapsules produced using a variety of cell  
92 concentrations. Representative micrographs out n=3 experiments. Scale bars represent 200  $\mu\text{m}$ .

93

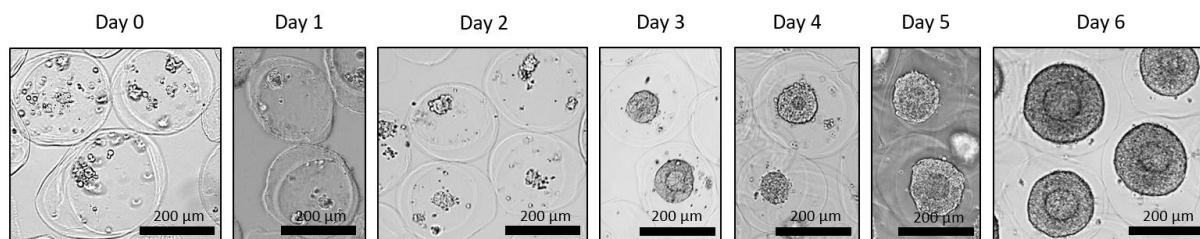

94  
 95 **Figure S12 Embryoid body formation by in-air microcapsulated hPSCs.** Microphotographs of  
 96 encapsulated hPSCs show aggregation and lumenogenesis. Representative micrographs out n=3  
 97 experiments. Scale bar represents 200 μm.

98

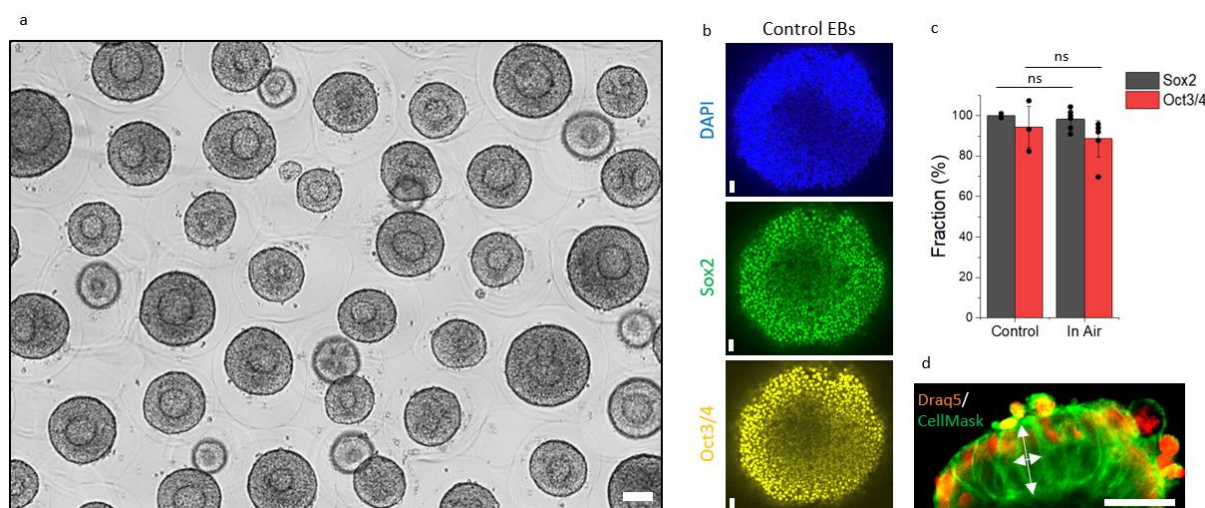

99  
 100 **Figure S13. Mass production of embryoid body by in-air microcapsulating hPSCs.** (a)  
 101 Microphotograph of EBs formed within in-air produced alginate microcapsules. Representative  
 102 micrographs out n=3 experiments. (b) Fluorescence microphotograph of EBs produced using  
 103 microwells with 5000 cells/microwell, which were stained with DAPI for nuclei (blue), SOX2 (green),  
 104 and OCT3/4 (yellow) for pluripotency. (c) Quantification and comparison of pluripotency by percentage  
 105 of cells positive for SOX2 and OCT3/4 between EBs produced with conventional microwells or In Air  
 106 microfluidics (n=300 cells). Data is presented as mean values +/- SD. Significance was determined  
 107 based on one-way Anova analysis. Significance was determined based on one-way Anova analysis.

108 Significance of  $p < 0.05$  is indicated by \*. (d) Confocal microphotograph of an EB with its nucleus stained  
109 with Draq5 (orange) and its cell membrane stained with CellMask (green). Scale bars represent  $50 \mu\text{m}$ .  
110

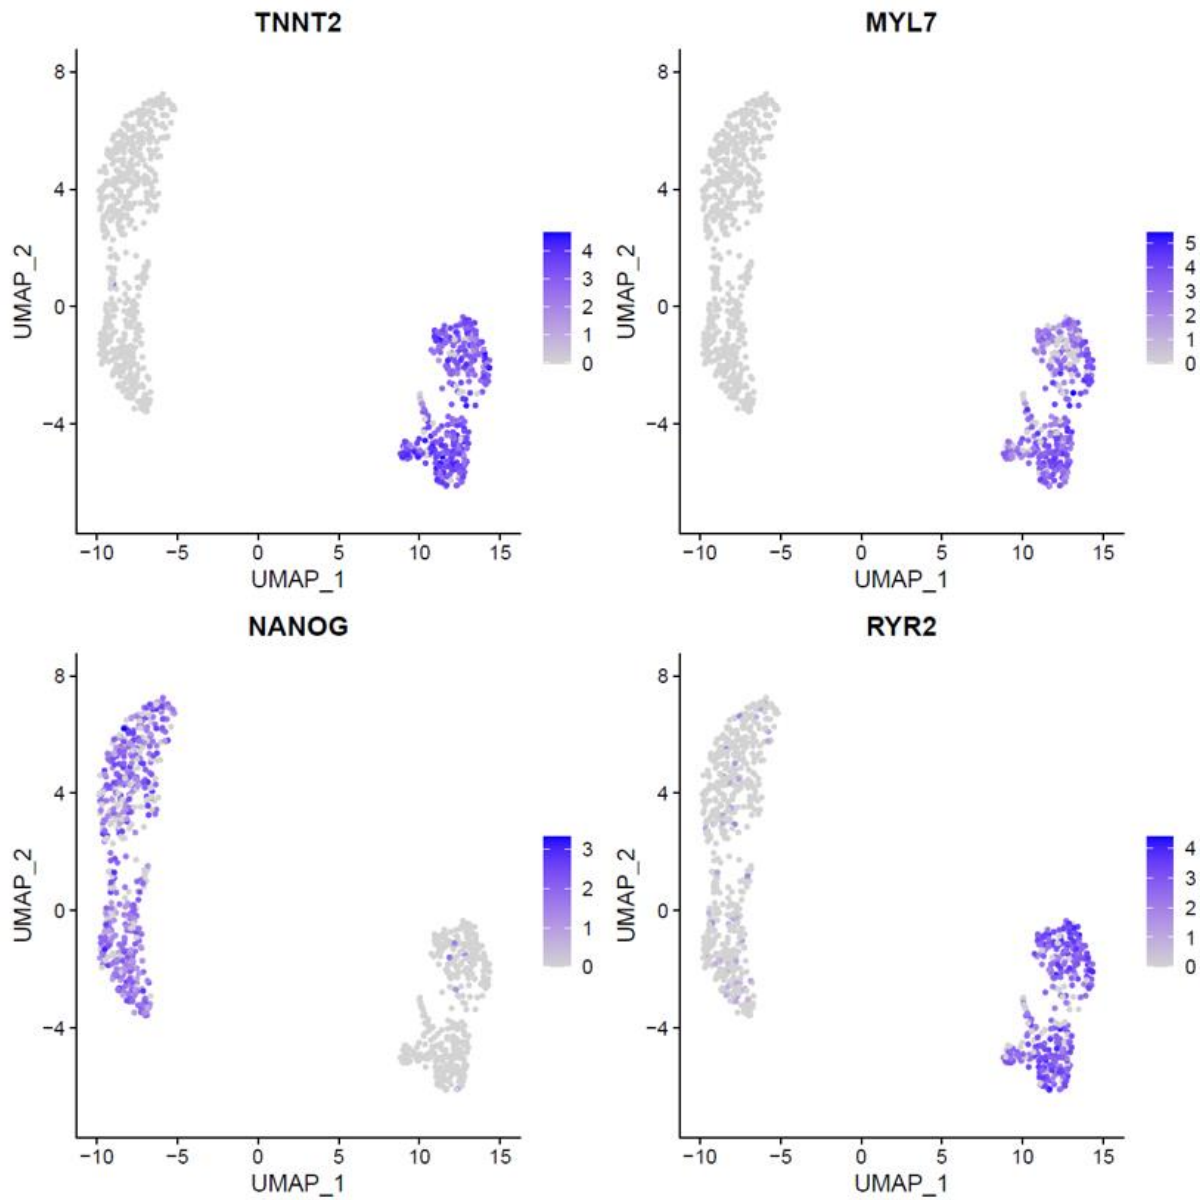

111

112 **Figure S14. Single cell RNA sequencing UMAP plots for pluripotency and cardiac markers.** Heatmap  
113 of NANOG, TNNT2, MYL7 and RYR2 gene expression in UMAP plots.

114

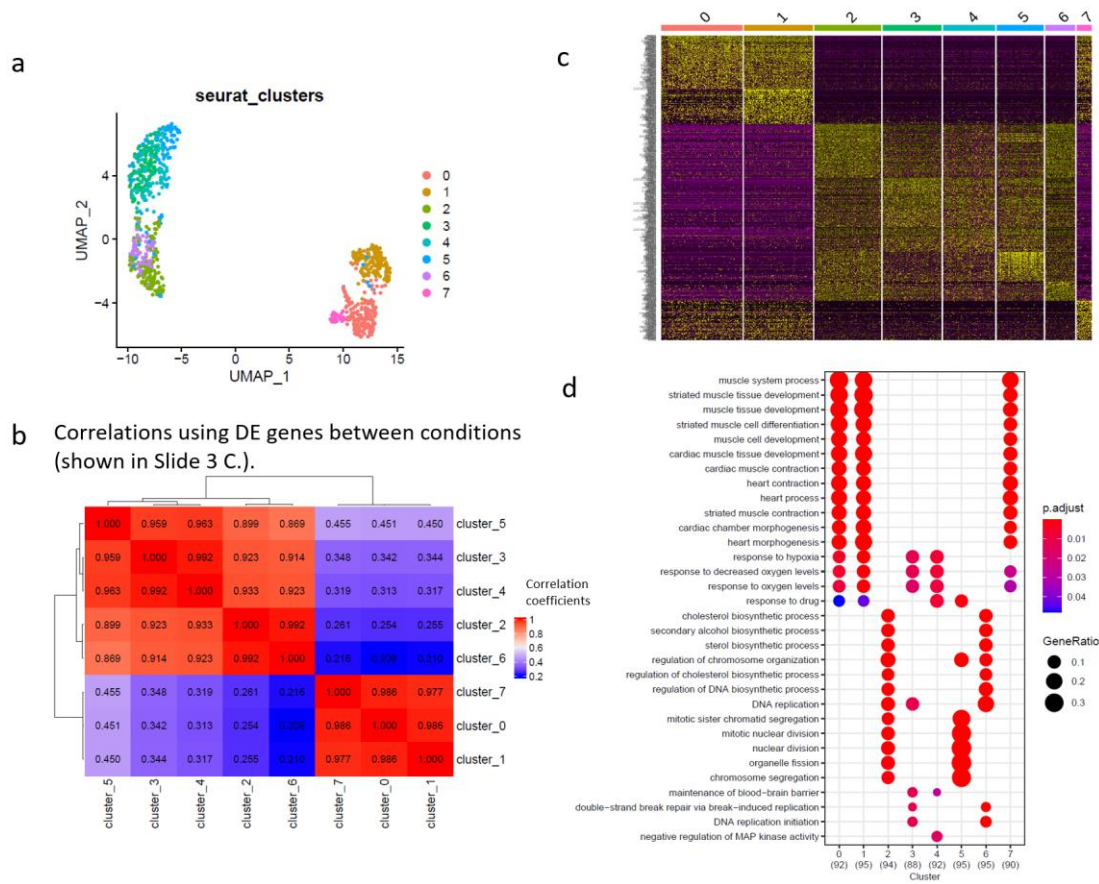

115

116 **Figure S15. Single cell RNA sequencing Seurat cluster data.** (a) Seurat clusters. (b) Correlation using  
 117 differential expression genes between conditions. (c) Heatmap of marker genes corresponding to  
 118 identified clusters. (d) Gene ontology heatmap of differential genes per cluster. P-adjust corrected  
 119 using Benjamini-Hochberg correction for multiple comparisons.

120

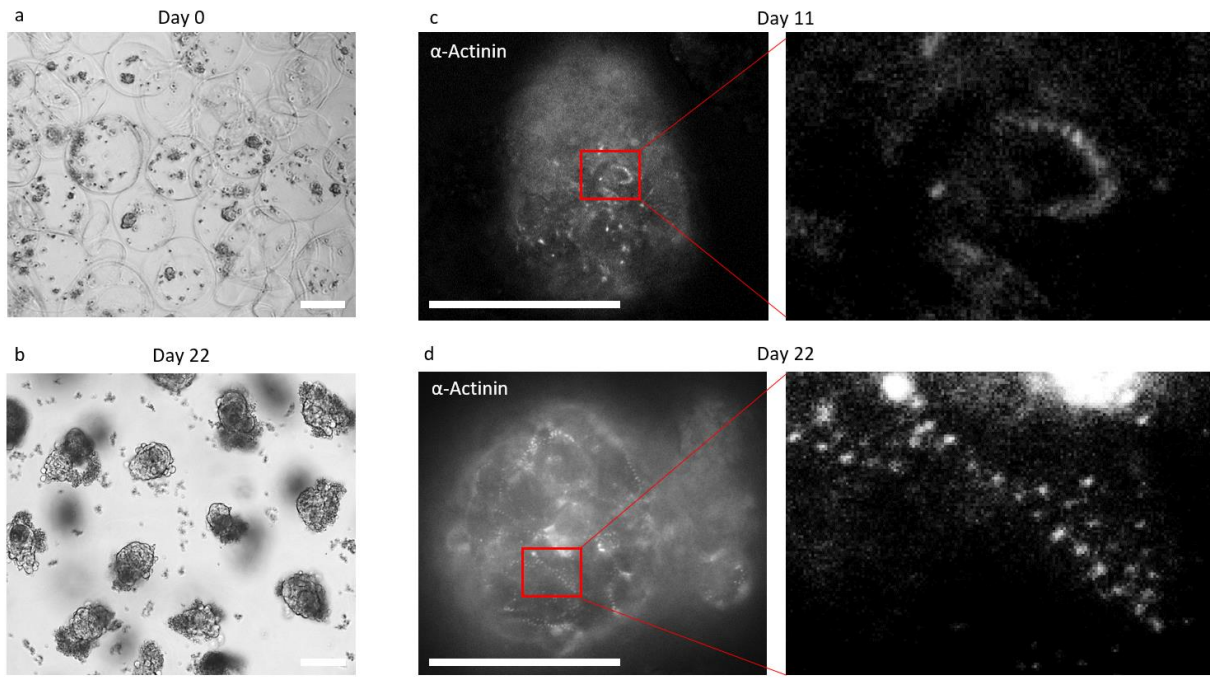

121

122 **Figure S16. Functional *human* cardiospheres produced in mass using in-air microfluidics.** (a)  
 123 Microphotograph of encapsulated *human* pluripotent stem cells immediate after microencapsulation.  
 124 (b) Microphotograph of encapsulated cardiospheres after 22 days of cardiac differentiation.  
 125 Fluorescence microphotograph of  $\alpha$ -actinin reporter in differentiated cardiomyocytes cultured after  
 126 (c) 11 days and (d) 22 days of culture. Scale bars represent 100  $\mu$ m.
