# Supplementary material for: Mass production of lumenogenic human embryoid bodies and functional cardiospheres using in-air-generated microcapsules
Source: PubMed Central journal article supplement (PMC10590445; doi:10.1038/s41467-023-42297-0), 2023-10-21
Supplement: 41467_2023_42297_MOESM2_ESM.pdf [file 41467_2023_42297_MOESM2_ESM.pdf]

## Description of Additional Supplementary Files

**Supplementary Data 1.** Single cell RNA sequencing barcode

**Supplementary Video 1.** In Air Microfluidic setup for mass production of microcapsules. Sequential start flow of core jet, actuation of piezo element at 5.5 kHz, start flow shellprecursor jet and start flow crosslinker jet.

**Supplementary Video 2.** Spontaneous contraction of cardiospheres. Brightfield microscopy video of spontaneously contracting cardiospheres within In Air generated microcapsules.

**Supplementary Video 3.** Calcium flux of (non-)stimulated cardiospheres. Calcium flux of cardiospheres within In Air generated microcapsules as visualized by Fluo-4 AM. Cardiospheres were stimulated at 0Hz, 0.5 Hz, 1 Hz and 2 Hz.

**Supplementary Video 4.** Sarcomere contraction in non-stimulated cardiospheres. Brightfield video, fluorescent microscopy video for NKX 2-5 GFP-positive and fluorescent microscopy video for alpha-actinin mCherry-positive sarcomeres in a cardiospheres within an In Air generated microcapsule.

**Supplementary Video 5.** Control plated cardiospheres. Brightfield video of control cardiospheres which were plated on a culture plate.
